# Supplementary material
Source: PubMed Central journal article supplement (PMC1891256)

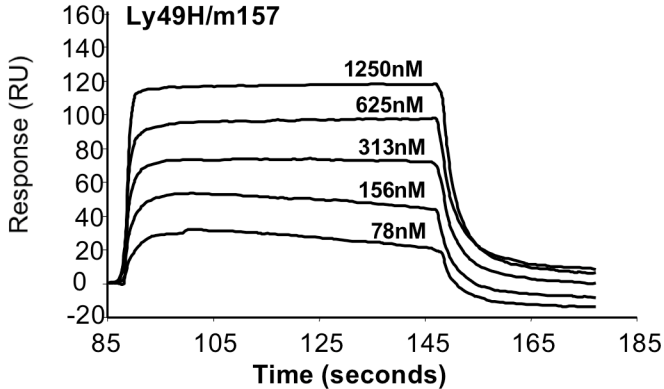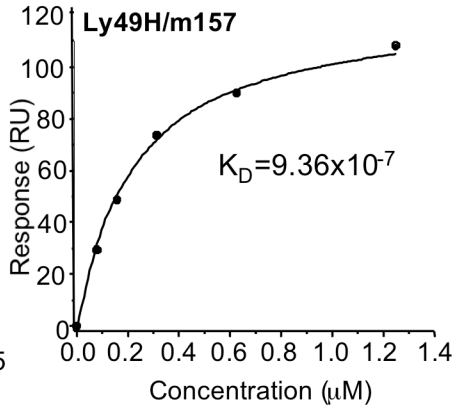

Supplement: pnas_0703735104_1.pdf [file pnas_0703735104_1.pdf]
